# Supplementary material
Source: Springer Nature journal article supplement (https://www.springermedizin.de/resource/supplementary/13044_2010_31_MOESM1_ESM.pdf/9659970)
Supplement: MOESM1 [file 9659970]

**761 patients**

**102 Hashimoto's (13.4%)**

**659 No Hashimoto's**

**46 clinically hypothyroid (6%)**

**9 sub-clinical (1.2%)**

**47 euthyroid (6.2%)**

**30 TPO not recorded**

**13 positive TPO**

**3 negative TPO**

**6 TPO not recorded**

**1 positive TPO**

**2 negative TPO**

**34 TPO not recorded**

**7 positive TPO**

**6 negative TPO**
